# Supplementary material
Source: MDPI journal article supplement (https://www.mdpi.com/2079-9284/5/2/34)
Supplement: s1 [file s1]

# Alkenones as a Promising Green Alternative for Waxes in Cosmetics and Personal Care Products

Kyle McIntosh <sup>1</sup>, Amber Smith <sup>2</sup>, Lisa K. Young <sup>3</sup>, Michael A. Leitch <sup>4</sup>, Amit K. Tiwari <sup>1</sup>, Christopher M. Reddy <sup>5</sup>, Gregory W. O'Neil <sup>4</sup>, Matthew W. Liberatore <sup>3</sup>, Mark Chandler <sup>6</sup> and Gabriella Baki <sup>2,\*</sup>

<sup>1</sup> Department of Pharmacology and Experimental Therapeutics, College of Pharmacy and Pharmaceutical Sciences, University of Toledo, Toledo, OH 43614, USA; Kyle.McIntosh@rockets.utoledo.edu (K.M.); Amit.Tiwari@UToledo.edu (A.K.T.)

<sup>2</sup> Department of Pharmacy Practice, College of Pharmacy and Pharmaceutical Sciences, University of Toledo, Toledo, OH 43614, USA; Amber.Smith3@rockets.utoledo.edu

<sup>3</sup> Department of Chemical Engineering, College of Engineering, University of Toledo, Toledo, Toledo, OH 43606, USA; Lisa.Young3@rockets.utoledo.edu (L.K.Y.); Matthew.Liberatore@UToledo.edu (M.W.L.)

<sup>4</sup> Department of Chemistry, Western Washington University, Bellingham, WA 98225, USA; leitchm@wwu.edu (M.A.L.); Gregory.O'Neil@wwu.edu (G.W.O.)

<sup>5</sup> Department of Marine Chemistry and Geochemistry, Woods Hole Oceanographic Institution (WHOI), Woods Hole, MA 02543, USA; creddy@whoi.edu

<sup>6</sup> ACT Solutions Corp, Newark, DE 19713, USA; mark@actsolutionscorp.com

\* Correspondence: Gabriella.Baki@utoledo.edu; Tel.: +1-419-383-1973

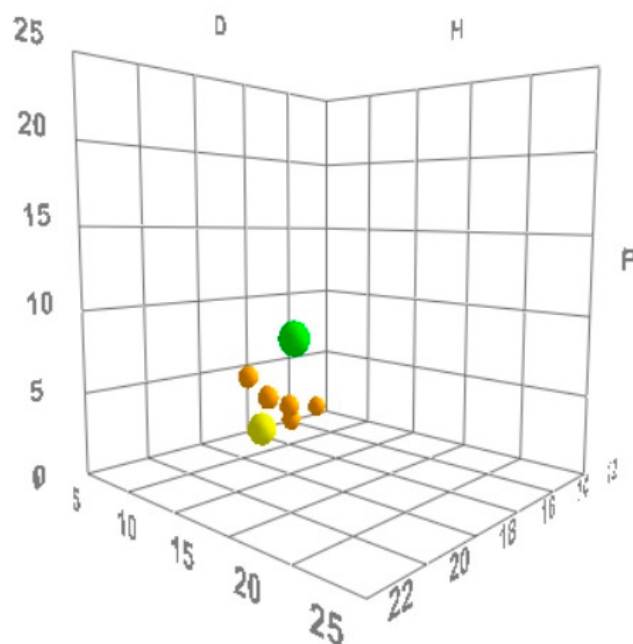

**Figure S1.** Hansen Space for the alkenones (yellow), five solvents (orange), and skin (green).

**Table S1.** Stability results of lipsticks and lip balms.

| Time point | Lipstick |                    |      |                    |      |      | Lip balm |        |              |              |                                             |        |
|------------|----------|--------------------|------|--------------------|------|------|----------|--------|--------------|--------------|---------------------------------------------|--------|
|            | 1        |                    | 2    |                    | 3    |      | 1        |        | 2            |              | 3                                           |        |
|            | 25°C     | 45°C               | 25°C | 45°C               | 25°C | 45°C | 25°C     | 45°C   | 25°C         | 45°C         | 25°C                                        | 45°C   |
| Day 1      | -        | -                  | -    | -                  | -    | -    | -        | -      | -            | -            | -                                           | -      |
| Week 1     | -        | -                  | -    | -                  | -    | -    | -        | + soft | -            | + soft       | -                                           | + soft |
| Week 2     | -        | -                  | -    | -                  | -    | -    | -        | + soft | -            | ++ very soft | -                                           | + soft |
| Week 4     | -        | + slight sweating  | -    | + slight sweating  | -    | -    | -        | + soft | ++ very soft | ++ very soft | + (vertical cracks on stick's side)         | + soft |
| Week 6     | -        | + slight sweating  | -    | + slight sweating  | -    | -    | -        | + soft | ++ very soft | ++ very soft | + (vertical cracks on stick's side)         | + soft |
| Week 8     | -        | + slight sweating  | -    | + slight sweating  | -    | -    | -        | + soft | ++ very soft | ++ very soft | + (vertical cracks on stick's side)         | + soft |
| Week 10    | -        | ++ severe sweating | -    | ++ severe sweating | -    | -    | -        | + soft | ++ very soft | ++ very soft | + (vertical cracks on stick's top and side) | + soft |

Coding: -: no change, +: slightly noticeable change, ++: significant change.

**Table S2.** Stability of creams.

| Time point  | Cream 1 |       | Cream 2 |       | Cream 3 |       | Cream 4 |       |
|-------------|---------|-------|---------|-------|---------|-------|---------|-------|
| Temperature | 25 °C   | 45 °C |
| Week 1      | -       | +     | -       | -     | -       | -     | -       | -     |
| Week 2      | -       | +     | -       | +     | -       | ++    | -       | ++    |
| Week 4      | -       | +     | -       | +     | -       | -     | -       | -     |
| Week 6      | -       | +     | -       | +     | -       | -     | -       | -     |
| Week 8      | -       | +     | -       | +     | -       | -     | -       | -     |
| Week 10     | -       | +     | -       | +     | -       | -     | -       | -     |

Coding: -: no change, +: slightly noticeable change (i.e., reversible separation), ++: significant change (i.e., irreversible separation).
